# Supplementary material
Source: PubMed Central journal article supplement (PMC4874868)

A

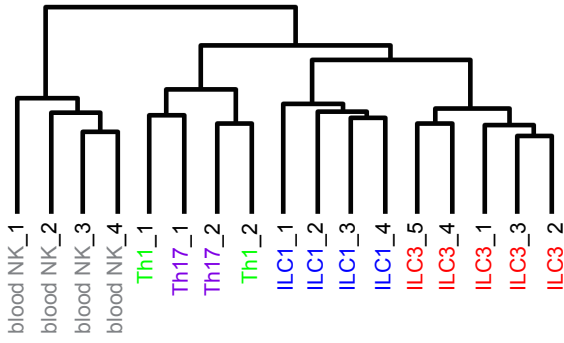

B

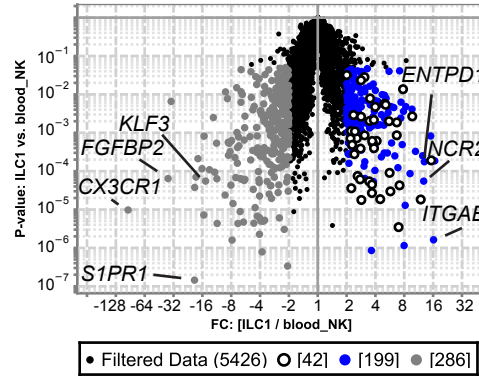

C

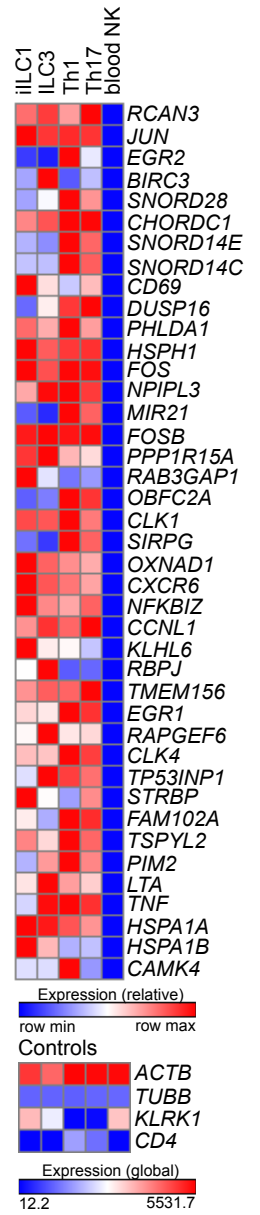

D

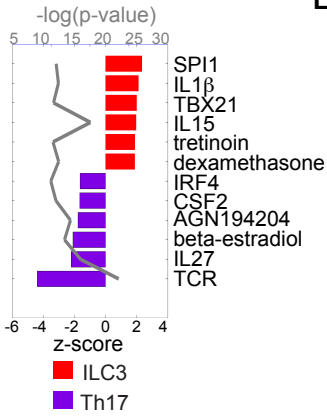

E

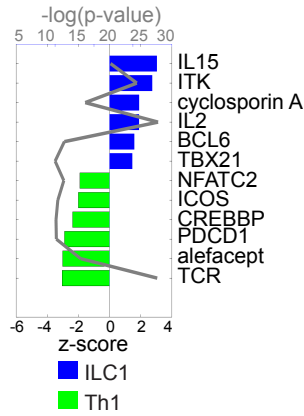

F

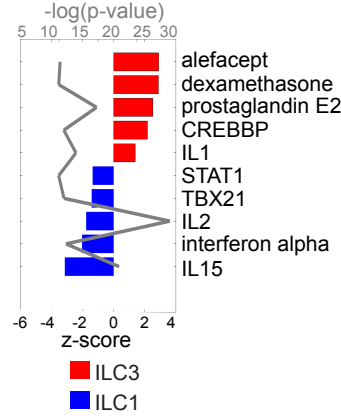

Supplement: NIHMS776743-supplement-2.pdf [file NIHMS776743-supplement-2.pdf]

Fig S2.

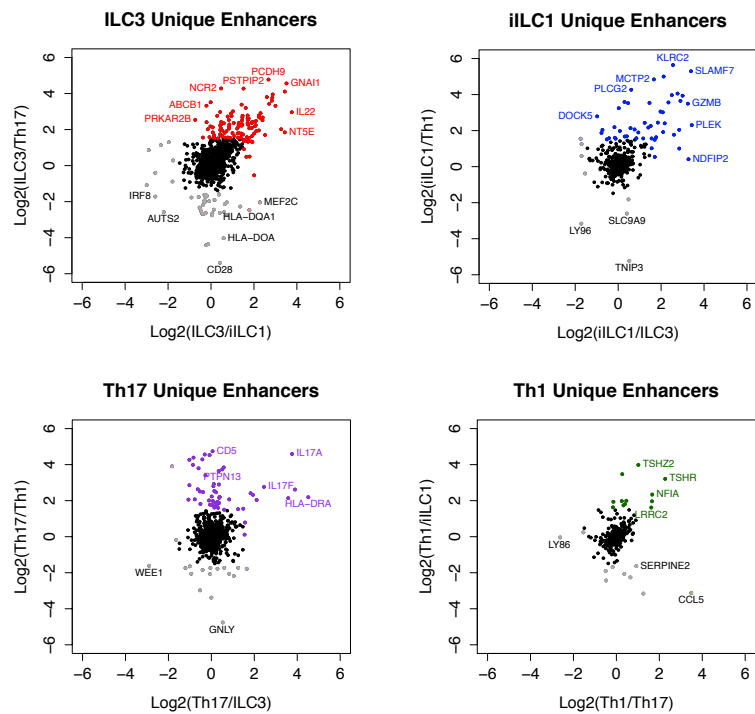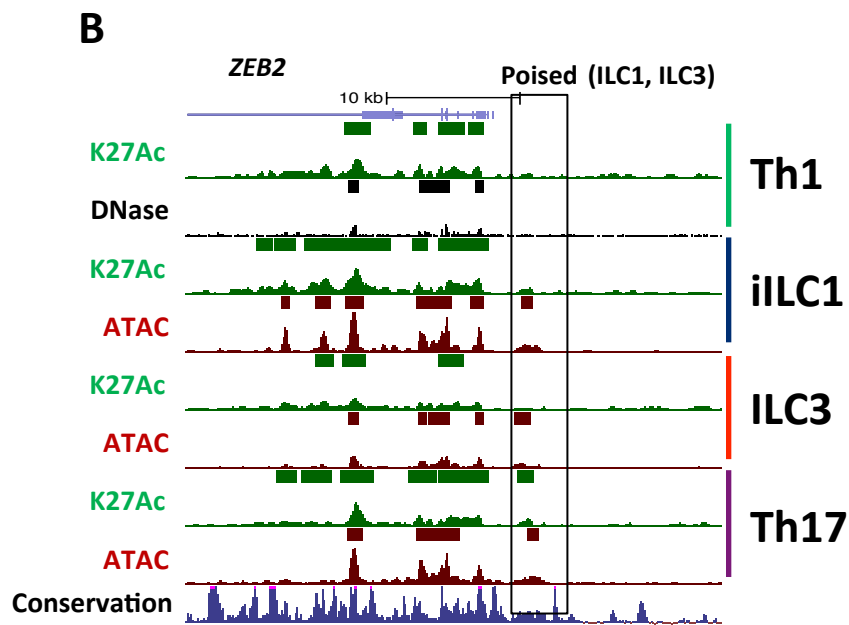

**C** Expression Near Active vs Poised Enhancers

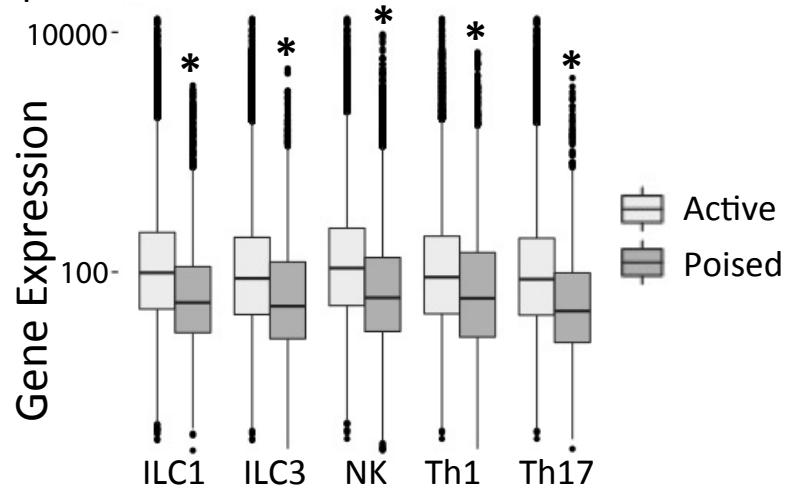

Supplement: NIHMS776743-supplement-3.pdf [file NIHMS776743-supplement-3.pdf]

Fig S3

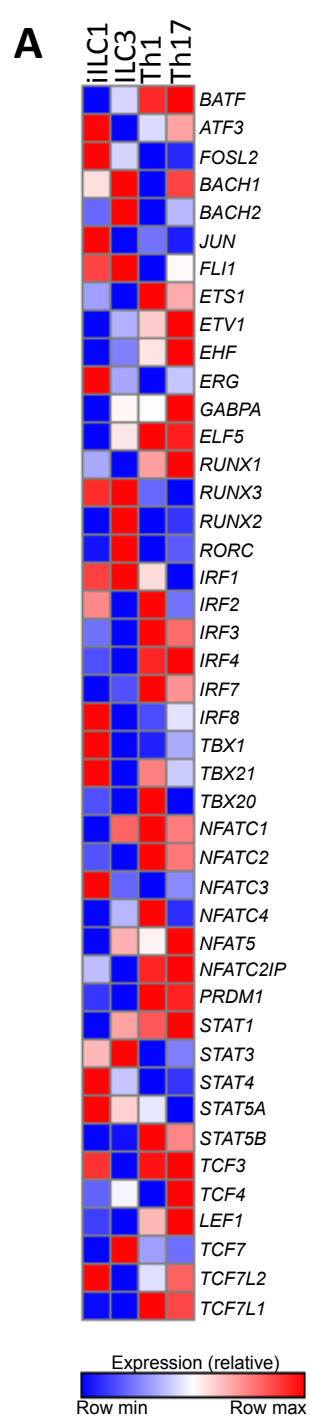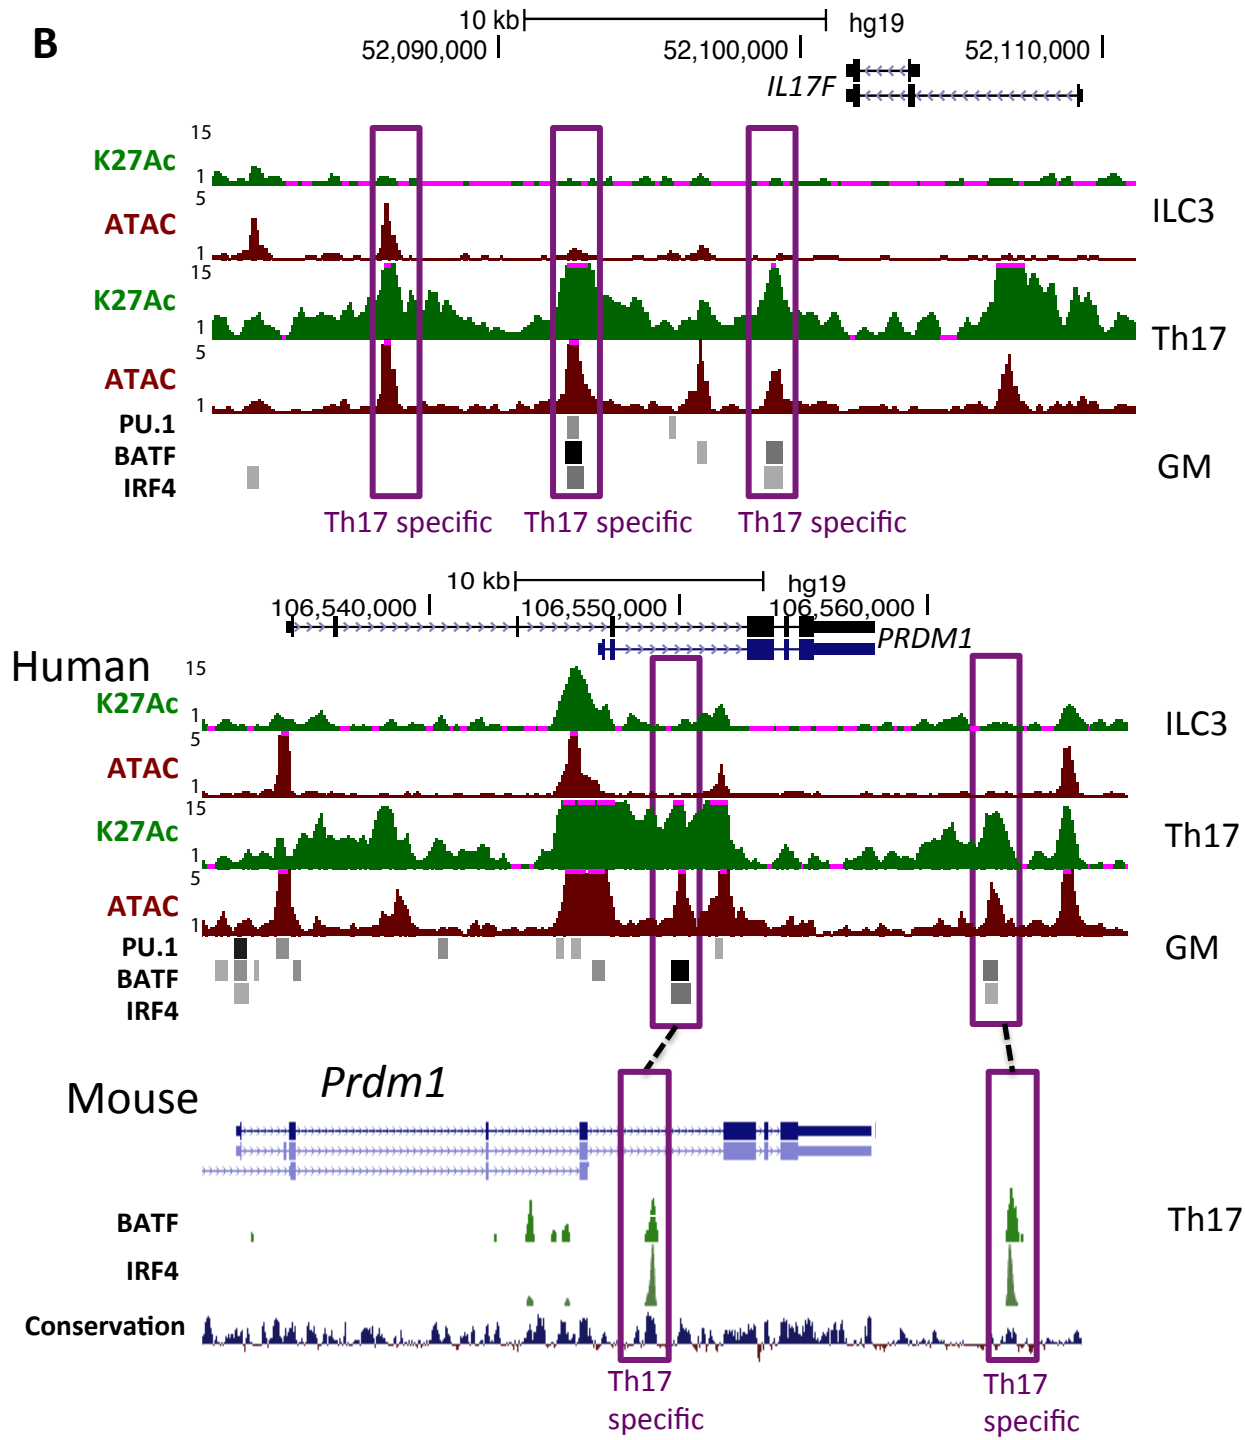

Supplement: NIHMS776743-supplement-4.pdf [file NIHMS776743-supplement-4.pdf]

Fig S4

A.

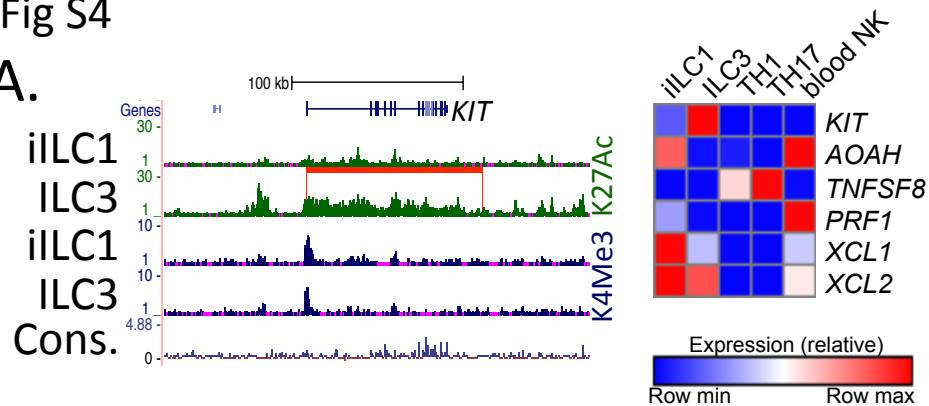

B.

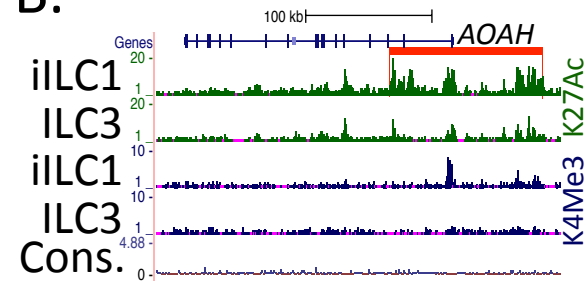

C.

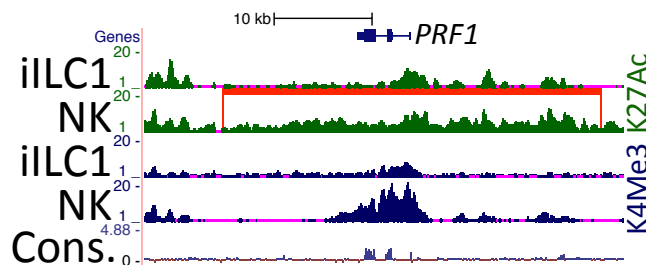

D.

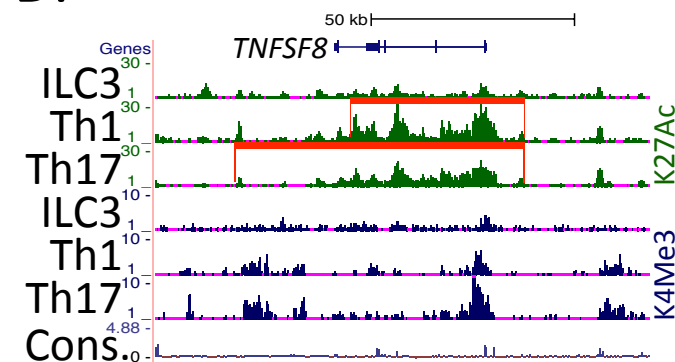

E.

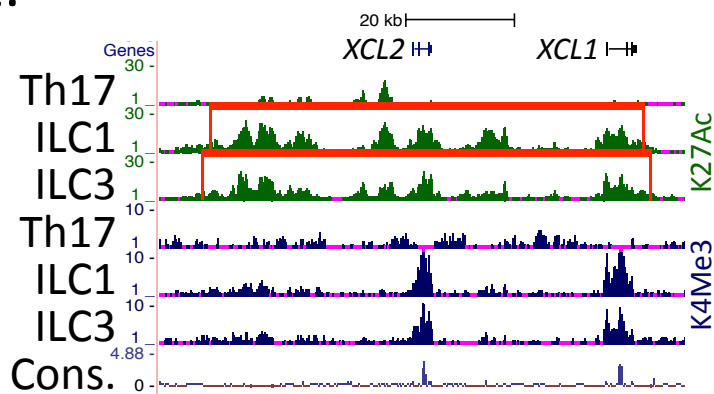

F.

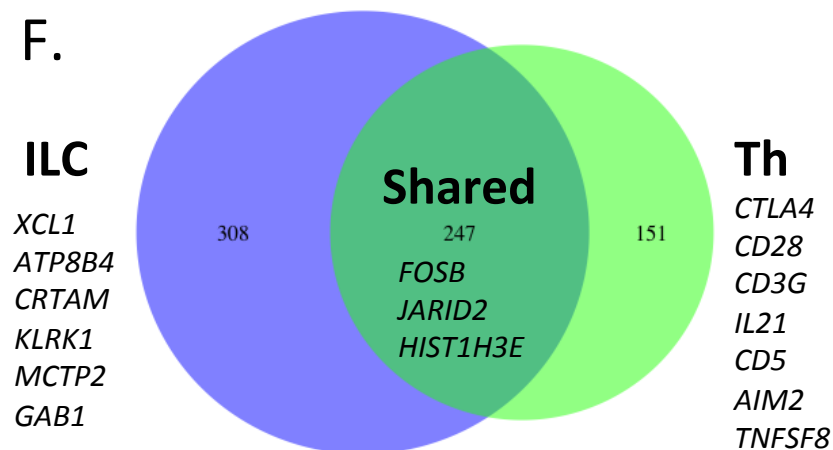

Supplement: NIHMS776743-supplement-5.pdf [file NIHMS776743-supplement-5.pdf]
